# Supplementary material
Source: PubMed Central journal article supplement (PMC6990444)
Supplement: ao9b00237_si_001.pdf [file ao9b00237_si_001.pdf]

## *Supplementary Material*

### **Metabolite profiling of the gut microbiome in mice with dietary administration of black raspberries**

Pengcheng Tu<sup>1</sup>, Xiaoming Bian<sup>2</sup>, Liang Chi<sup>1</sup>, Jingchuan Xue<sup>1</sup>, Bei Gao<sup>2</sup>, Yunjia Lai<sup>1</sup>, Hongyu Ru<sup>3</sup>, Kun Lu<sup>1\*</sup>

1. Department of Environmental Sciences and Engineering,

University of North Carolina at Chapel Hill, Chapel Hill, NC, 27599, United States

2. Department of Environmental Health Sciences,

University of Georgia, Athens, GA, 30602, United States

3. Department of Population Health and Pathobiology,

North Carolina State University, Raleigh, NC, 27607, United States

\* Corresponding Author

Kun Lu, PhD

Department of Environmental Sciences and Engineering

University of North Carolina at Chapel Hill, Chapel Hill, NC, 27599

Tel: 919-966-7337

Email: [kunlu@unc.edu](mailto:kunlu@unc.edu)

## Supplementary Tables

Table S1. List of identified fecal metabolites that are significantly elevated in mice of BRB diet compared to mice of control diet.

| metabolites                                                             | fold change | p-value | RT (min) | m/z      | Ontology                            |
|-------------------------------------------------------------------------|-------------|---------|----------|----------|-------------------------------------|
| Diaminopimelic acid                                                     | 2.8         | 2.0E-04 | 1.1      | 191.1012 | Alpha amino acids                   |
| N5-(4-Methoxybenzyl)glutamine                                           | 2.4         | 3.5E-05 | 4.3      | 267.1347 | Alpha amino acids                   |
| 2-Aminobenzoic acid                                                     | 42.7        | 6.3E-07 | 6.6      | 138.0559 | Aminobenzoic acids                  |
| [2-(Dimethoxymethyl)-1-heptenyl]benzene                                 | 8.9         | 7.1E-06 | 8.8      | 249.1839 | Benzene and substituted derivatives |
| 4-Methyl-1-phenyl-2-pentanol                                            | 4.3         | 1.7E-05 | 12.3     | 179.1407 | Benzene and substituted derivatives |
| Biliverdin                                                              | 5.6         | 7.8E-05 | 9.7      | 583.2573 | Bilirubins                          |
| Tetrahydrobiopterin                                                     | 995.7       | 4.0E-04 | 8.8      | 242.1274 | Biopterins and derivatives          |
| (S)-Neolyratyl acetate                                                  | 3.9         | 5.3E-05 | 8.5      | 195.1361 | Carboxylic acid esters              |
| 3-beta-Hydroxy-4-beta-methyl-5-alpha-cholest-7-ene-4-alpha-carbaldehyde | 15.2        | 6.0E-06 | 12.0     | 429.3705 | Cholesterols and derivatives        |
| N6-Acetyl-L-lysine                                                      | 6.6         | 2.2E-05 | 2.1      | 189.1233 | D-alpha-amino acids                 |
| Alanyl-Isoleucine                                                       | 6.1         | 6.6E-04 | 3.8      | 203.1374 | Dipeptides                          |
| Alanyl-Phenylalanine                                                    | 4.6         | 7.2E-06 | 5.1      | 237.1234 | Dipeptides                          |
| Asparaginyln-Leucine                                                    | 2.7         | 3.3E-04 | 1.7      | 246.1447 | Dipeptides                          |

|                                  |      |         |      |          |                                                                  |
|----------------------------------|------|---------|------|----------|------------------------------------------------------------------|
| Glycyl-Methionine                | 5.0  | 7.1E-05 | 2.4  | 207.0815 | Dipeptides                                                       |
| Glycyl-Phenylalanine             | 2.8  | 1.4E-03 | 5.1  | 223.1075 | Dipeptides                                                       |
| Isoleucyl-Isoleucine             | 4.5  | 4.2E-03 | 6.6  | 245.1840 | Dipeptides                                                       |
| Leucyl-Isoleucine                | 3.1  | 5.0E-06 | 5.7  | 245.1844 | Dipeptides                                                       |
| Leucyl-phenylalanine             | 3.8  | 5.4E-04 | 5.9  | 279.1709 | Dipeptides                                                       |
| Leucyl-Serine                    | 2.1  | 4.3E-03 | 1.8  | 219.1329 | Dipeptides                                                       |
| Leucyl-Threonine                 | 4.0  | 8.9E-04 | 2.6  | 233.1493 | Dipeptides                                                       |
| Methionyl-Threonine              | 4.7  | 5.3E-04 | 2.9  | 251.1057 | Dipeptides                                                       |
| Phenylalanyl-Valine              | 5.1  | 1.8E-03 | 5.4  | 265.1554 | Dipeptides                                                       |
| Serylisoleucine                  | 4.6  | 4.8E-04 | 4.3  | 219.1347 | Dipeptides                                                       |
| Serylvaline                      | 7.1  | 3.9E-03 | 1.9  | 205.1173 | Dipeptides                                                       |
| Valyl-Serine                     | 2.4  | 1.0E-03 | 1.2  | 205.1172 | Dipeptides                                                       |
| Valyl-Valine                     | 3.1  | 1.9E-04 | 4.2  | 217.1518 | Dipeptides                                                       |
| Cinnassiol D4 2-<br>glucoside    | 10.8 | 5.7E-07 | 8.0  | 515.2851 | Diterpene glycosides                                             |
| Ergosterol                       | 9.5  | 2.2E-04 | 11.7 | 397.3438 | Ergosterols and derivatives                                      |
| alpha-Rotunol                    | 17.4 | 1.7E-04 | 8.5  | 235.1681 | Eudesmane, isoeudesmane or<br>cycloeudesmane<br>sesquiterpenoids |
| Kaempferol 3-<br>sophorotrioside | 46.5 | 3.6E-05 | 3.7  | 773.2136 | Flavonoid-3-O-glycosides                                         |
| 4-Guanidinobutanoic acid         | 5.0  | 9.5E-04 | 1.5  | 146.0927 | Gamma amino acids and<br>derivatives                             |
| Galactosylhydroxylysine          | 3.4  | 5.9E-05 | 1.7  | 325.1617 | Glycosyl-amino acids                                             |

|                                |        |         |      |          |                                       |
|--------------------------------|--------|---------|------|----------|---------------------------------------|
| Protocatechuic acid            | 889.5  | 1.3E-06 | 4.9  | 155.0341 | Hydroxybenzoic acid derivatives       |
| Dehydrozingerone               | 35.9   | 3.6E-03 | 6.1  | 193.0874 | Hydroxycinnamic acids and derivatives |
| 5,6-Dihydro-11-methoxyyangonin | 5.1    | 2.5E-05 | 1.1  | 291.1228 | Kavalactones                          |
| Pyrraline                      | 3.1    | 1.0E-03 | 2.5  | 255.1317 | L-alpha-amino acids                   |
| Kinocoumarin                   | 44.7   | 7.5E-04 | 10.0 | 381.2081 | Linear pyranocoumarins                |
| 15,16-DiHODE                   | 1.9    | 2.1E-03 | 9.5  | 313.2351 | Lineolic acids and derivatives        |
| Alpha-Linolenic acid           | 3.0    | 1.6E-05 | 12.0 | 279.2306 | Lineolic acids and derivatives        |
| Corchorifatty acid A           | 8.6    | 1.9E-04 | 9.3  | 309.2028 | Lineolic acids and derivatives        |
| Stearidonic acid               | 10.9   | 8.7E-06 | 12.3 | 277.2149 | Lineolic acids and derivatives        |
| 12,13-DHOME                    | 2.0    | 9.5E-03 | 10.4 | 315.2509 | Long-chain fatty acids                |
| 15(16)-EpODE                   | 2.9    | 1.5E-04 | 8.5  | 295.2254 | Long-chain fatty acids                |
| N-Oleoylethanolamine           | 3.5    | 5.8E-03 | 13.5 | 326.3049 | N-acylethanolamines                   |
| menaquinone-1                  | 3.6    | 3.0E-03 | 4.7  | 243.1351 | Naphthalenes                          |
| Alanyl-Leucine                 | 3.2    | 4.7E-05 | 4.7  | 203.1397 | Peptides                              |
| Protoporphyrin IX              | 18.0   | 3.2E-05 | 13.7 | 563.2662 | Porphyrins                            |
| 15-Deoxy-d-12,14-PGJ2          | 9.1    | 4.6E-06 | 12.3 | 317.2080 | Prostaglandins and related compounds  |
| Prostaglandin E2               | 2.6    | 1.5E-03 | 8.8  | 353.2348 | Prostaglandins and related compounds  |
| 1-Pyrroline                    | 3937.9 | 9.5E-06 | 2.5  | 70.0665  | Pyrrolines                            |
| Bisacurone epoxide             | 13.0   | 9.9E-07 | 5.9  | 269.1749 | Sesquiterpenoids                      |

|                               |        |         |      |          |              |
|-------------------------------|--------|---------|------|----------|--------------|
| 13'-Hydroxy-alpha-tocopherol  | 4869.8 | 1.1E-06 | 11.9 | 447.3793 | Tocopherols  |
| 13'-Carboxy-alpha-tocotrienol | 2.9    | 4.4E-08 | 8.9  | 455.3189 | Tocotrienols |
| Alpha-Tocotrienol             | 4.9    | 1.1E-06 | 11.2 | 425.3386 | Tocotrienols |

Table S2. MS/MS spectral match of the identified metabolites.

| Metabolite                              | Score* | m/z      | Precursor          | Database    | Fragments**                                                 |
|-----------------------------------------|--------|----------|--------------------|-------------|-------------------------------------------------------------|
| (S)-Neolarytyl acetate                  | 7.5    | 195.1361 | [M+H] <sup>+</sup> | HMDB0041497 | 41.0362, 55.0540,<br>79.0524, 91.0535,<br>93.0688, 135.1166 |
| [2-(Dimethoxymethyl)-1-heptenyl]benzene | 7.4    | 249.1839 | [M+H] <sup>+</sup> | HMDB0036221 | 67.0523, 91.0529,<br>93.0687, 95.0852                       |
| 12,13-DHOME                             | 7.2    | 315.2509 | [M+H] <sup>+</sup> | HMDB0004705 | 67.0562, 197.1469                                           |
| 13'-Carboxy-alpha-tocotrienol           | 6.0    | 455.3189 | [M+H] <sup>+</sup> | HMDB0012556 | 165.0894, 437.3058                                          |
| 13'-Hydroxy-alpha-tocopherol            | 6.1    | 447.3793 | [M+H] <sup>+</sup> | HMDB0012559 | 55.0572, 69.0670,<br>111.1157, 165.0886                     |
| 15(16)-EpODE                            | 7.0    | 295.2254 | [M+H] <sup>+</sup> | HMDB0010206 | 43.0546, 139.1119,<br>205.1663, 277.2138                    |
| 15,16-DiHODE                            | 7.1    | 313.2351 | [M+H] <sup>+</sup> | HMDB0010208 | 43.0547, 249.2150,<br>277.2152, 295.2203                    |
| 15-Deoxy-d-12,14-PGJ2                   | 8.1    | 317.208  | [M+H] <sup>+</sup> | HMDB0005079 | 151.1491, 161.1313                                          |
| 1-Pyrroline                             | 8.7    | 70.0665  | [M+H] <sup>+</sup> | HMDB0012497 | 41.0404, 42.0405,<br>43.0531, 44.0540                       |

|                                                                         |     |          |                    |             |                                                      |
|-------------------------------------------------------------------------|-----|----------|--------------------|-------------|------------------------------------------------------|
| 2-Aminobenzoic acid                                                     | 7.0 | 138.0559 | [M+H] <sup>+</sup> | HMDB0001123 | 65.0396, 120.0449                                    |
| 3-beta-Hydroxy-4-beta-methyl-5-alpha-cholest-7-ene-4-alpha-carbaldehyde | 7.1 | 429.3705 | [M+H] <sup>+</sup> | HMDB0059643 | 57.0697, 69.0701                                     |
| 4-Guanidinobutanoic acid                                                | 8.2 | 146.0927 | [M+H] <sup>+</sup> | HMDB0003464 | 41.0405, 56.0503, 60.0577, 87.0454, 128.0831         |
| 4-Methyl-1-phenyl-2-pentanol                                            | 8.3 | 179.1407 | [M+H] <sup>+</sup> | HMDB0031568 | 67.0566, 69.0712, 79.0541, 81.0690, 91.0523, 93.0719 |
| 5,6-Dihydro-11-methoxyyangonin                                          | 7.1 | 291.1228 | [M+H] <sup>+</sup> | HMDB0038722 | 43.0180, 83.0594, 99.0446, 129.0630, 187.0663        |
| Alanyl-Isoleucine                                                       | 7.6 | 203.1374 | [M+H] <sup>+</sup> | HMDB0028690 | 44.0469, 84.0752, 86.0926                            |
| Alanyl-Leucine                                                          | 8.2 | 203.1397 | [M+H] <sup>+</sup> | HMDB0028691 | 44.0512, 86.0974, 132.1021                           |
| Alanyl-Phenylalanine                                                    | 7.8 | 237.1234 | [M+H] <sup>+</sup> | HMDB0028694 | 44.0508, 120.0806, 166.0858                          |
| Alpha-Linolenic acid                                                    | 7.6 | 279.2306 | [M+H] <sup>+</sup> | HMDB0001388 | 69.0701, 81.0707, 95.0846, 109.1022, 123.1168        |
| alpha-Rotunol                                                           | 7.7 | 235.1681 | [M+H] <sup>+</sup> | HMDB0035869 | 41.0365, 69.0701, 95.0865, 199.1434                  |

|                                  |     |          |                    |             |                                                        |
|----------------------------------|-----|----------|--------------------|-------------|--------------------------------------------------------|
| Alpha-Tocotrienol                | 6.7 | 425.3386 | [M+H] <sup>+</sup> | HMDB0006327 | 69.0683, 109.1019,<br>165.0837, 243.1411               |
| Asparaginy-Leucine               | 7.6 | 246.1447 | [M+H] <sup>+</sup> | HMDB0028735 | 86.0978                                                |
| Biliverdin                       | 6.7 | 583.2573 | [M+H] <sup>+</sup> | HMDB0001008 | 297.1207, 583.2532                                     |
| Bisacurone epoxide               | 7.1 | 269.1749 | [M+H] <sup>+</sup> | HMDB0038503 | 43.0541, 171.1141,<br>187.1458                         |
| Cinnassiol D4 2-<br>glucoside    | 7.5 | 515.2851 | [M+H] <sup>+</sup> | HMDB0035065 | 337.2336, 497.2750                                     |
| Corchorifatty acid A             | 7.1 | 309.2028 | [M+H] <sup>+</sup> | HMDB0032664 | 135.0765, 273.1796,<br>291.1888                        |
| Dehydrozingerone                 | 8.0 | 193.0874 | [M+H] <sup>+</sup> | HMDB0032591 | 51.0258, 57.0337,<br>147.0804, 175.0675                |
| Diaminopimelic acid              | 7.9 | 191.1012 | [M+H] <sup>+</sup> | HMDB0001370 | 56.0455, 70.0592,<br>145.0952                          |
| Ergosterol                       | 7.4 | 397.3438 | [M+H] <sup>+</sup> | HMDB0000878 | 83.0832, 123.1146                                      |
| Galactosylhydroxylysine          | 7.3 | 325.1617 | [M+H] <sup>+</sup> | HMDB0000600 | 55.0599, 72.0861                                       |
| Glycyl-Methionine                | 7.8 | 207.0815 | [M+H] <sup>+</sup> | HMDB0028847 | 87.0263, 105.0542                                      |
| Glycyl-Phenylalanine             | 7.9 | 223.1075 | [M+H] <sup>+</sup> | HMDB0028848 | 91.0538, 103.0537,<br>120.0803                         |
| Isoleucyl-Isoleucine             | 7.6 | 245.184  | [M+H] <sup>+</sup> | HMDB0028910 | 69.0674, 86.0959,<br>132.0931                          |
| Kaempferol 3-<br>sophorotrioside | 7.1 | 773.2136 | [M+H] <sup>+</sup> | HMDB0032008 | 287.0541, 447.0873,<br>575.1480, 593.1464,<br>611.1648 |
| Kinocoumarin                     | 7.0 | 381.2081 | [M+H] <sup>+</sup> | HMDB0039033 | 69.0674, 363.1992                                      |

|                               |     |          |                    |             |                                                      |
|-------------------------------|-----|----------|--------------------|-------------|------------------------------------------------------|
| Leucyl-Isoleucine             | 7.7 | 245.1844 | [M+H] <sup>+</sup> | HMDB0028932 | 69.0649, 86.0908                                     |
| Leucyl-phenylalanine          | 8.2 | 279.1709 | [M+H] <sup>+</sup> | HMDB0013243 | 69.0704, 86.0967,<br>120.0800, 166.0857              |
| Leucyl-Serine                 | 7.8 | 219.1329 | [M+H] <sup>+</sup> | HMDB0028938 | 60.0436, 69.0685,<br>86.0950                         |
| Leucyl-Threonine              | 7.6 | 233.1493 | [M+H] <sup>+</sup> | HMDB0028939 | 74.0600, 86.0974,<br>102.0555, 120.0640              |
| menaquinone-1                 | 6.5 | 243.1351 | [M+H] <sup>+</sup> | ECMDB20441  | 41.0403, 225.1245                                    |
| Methionyl-Threonine           | 7.0 | 251.1057 | [M+H] <sup>+</sup> | HMDB0028983 | 56.0498, 74.0594,<br>102.0552, 104.0511              |
| N5-(4-Methoxybenzyl)glutamine | 7.2 | 267.1347 | [M+H] <sup>+</sup> | HMDB0033598 | 82.0364, 136.0748                                    |
| N6-Acetyl-L-lysine            | 7.8 | 189.1233 | [M+H] <sup>+</sup> | HMDB0000206 | 72.0817                                              |
| N-Oleoylethanolamine          | 6.0 | 326.3049 | [M+H] <sup>+</sup> | HMDB02088   | 41.0372, 62.0603,<br>247.2483                        |
| Phenylalanyl-Valine           | 7.8 | 265.1554 | [M+H] <sup>+</sup> | HMDB0029008 | 72.0820, 103.0546,<br>120.0815                       |
| Prostaglandin E2              | 7.9 | 353.2348 | [M+H] <sup>+</sup> | HMDB0001220 | 55.0561, 93.0710,<br>259.1657, 293.2043,<br>335.2321 |
| Protocatechuic acid           | 6.6 | 155.0341 | [M+H] <sup>+</sup> | HMDB01856   | 109.0297, 137.0244                                   |
| Protoporphyrin IX             | 7.1 | 563.2662 | [M+H] <sup>+</sup> | HMDB0000241 | 563.2623                                             |
| Pyrraline                     | 7.2 | 255.1317 | [M+H] <sup>+</sup> | HMDB0033143 | 124.0360, 126.0504,<br>138.0498                      |



|                     |     |          |                    |             |                                                     |
|---------------------|-----|----------|--------------------|-------------|-----------------------------------------------------|
| Serylisoleucine     | 8.1 | 219.1347 | [M+H] <sup>+</sup> | HMDB0029042 | 44.0511, 60.0454,<br>86.0967, 132.1017,<br>173.1280 |
| Serylvaline         | 7.9 | 205.1173 | [M+H] <sup>+</sup> | HMDB0029052 | 42.0343, 60.0445,<br>118.0846, 159.1094             |
| Stearidonic acid    | 7.5 | 277.2149 | [M+H] <sup>+</sup> | HMDB0006547 | 43.0562, 55.0545,<br>79.0545, 121.1018,<br>135.1160 |
| Tetrahydrobiopterin | 7.9 | 242.1274 | [M+H] <sup>+</sup> | HMDB0000027 | 214.1153, 225.0936                                  |
| Valyl-Serine        | 7.7 | 205.1172 | [M+H] <sup>+</sup> | HMDB0029136 | 55.0547, 72.0792                                    |
| Valyl-Valine        | 7.4 | 217.1518 | [M+H] <sup>+</sup> | HMDB0029140 | 55.0555, 72.0810                                    |

\* The match scores were generated by MS-FINDER (cut-off: 6.0).

\*\* The experimental spectra were matched against HMDB and ECMDB to confirm the identification from MS-FINDER.
